# Supplementary material for: Insight into the crystallization process: relationships between crystal structures and properties of copper(ii) coordination polymers containing dimethylbis(4-pyridyl)silane
Source: Royal Society of Chemistry journal article supplement (doi:10.1039/c3ce40257f), 2013-01-01
Supplement: c3ce40257f.pdf [file c3ce40257f.pdf]

<Electronic Supplementary Information>

**Insight into the crystallization process: relationships between crystal structures and properties of copper(II) coordination polymers containing dimethylbis(4-pyridyl)silane**

So Yun Moon, Tae Hwan Noh and Ok-Sang Jung\*

Department of Chemistry, Pusan National University, Pusan 609-735, Korea

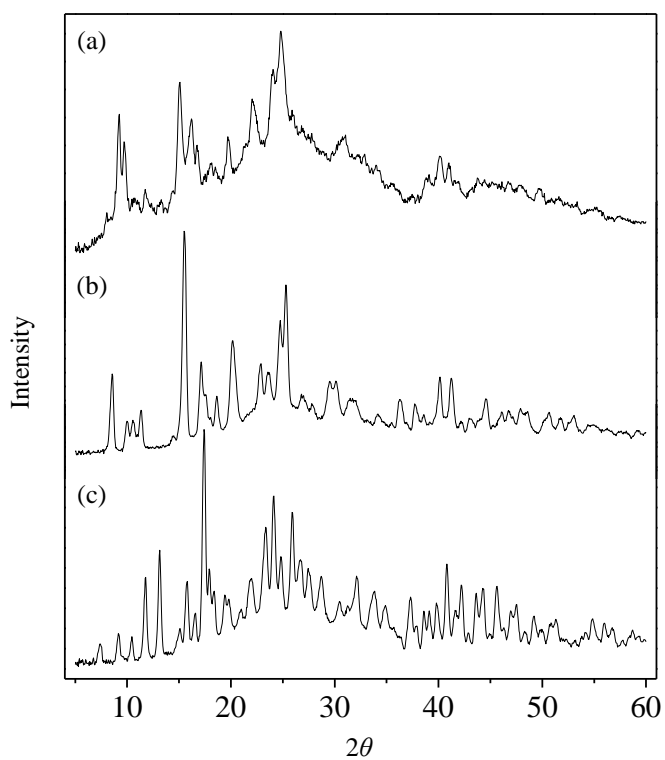

**Fig. S1.** Powder XRD data of  $[\text{Cu}(\text{L})_2\text{Br}_2]$  (a),  $[\text{Cu}(\text{L})_2\text{Br}]\text{Br}\cdot 2\text{Me}_2\text{SO}$  (b), and  $[\text{Cu}(\text{L})\text{Br}_2(\text{O}-\text{Me}_2\text{SO})]\cdot \text{Me}_2\text{SO}$  (c).

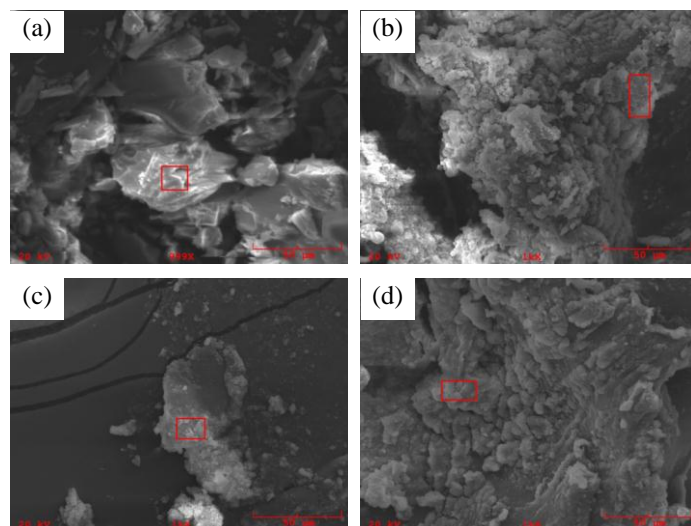

|                                                   | C      | N      | B     | O      | F      | Si     | Cl    | Br     | Cu    |
|---------------------------------------------------|--------|--------|-------|--------|--------|--------|-------|--------|-------|
| [Cu(L) <sub>2</sub> Br]Br<br>·2Me <sub>2</sub> SO | 62.292 | 5.884  | –     | –      | –      | 11.418 | –     | 13.939 | 6.467 |
| [Cu(L) <sub>2</sub> Br]BF <sub>4</sub>            | 62.262 | 8.490  | 2.662 | –      | 10.884 | 7.3981 | –     | 4.003  | 3.718 |
| [Cu(L) <sub>2</sub> Br]ClO <sub>4</sub>           | 58.844 | 6.740  | –     | 14.212 | –      | 7.838  | 3.710 | 4.675  | 3.980 |
| [Cu(L) <sub>2</sub> Br]NO <sub>3</sub>            | 59.217 | 11.552 | –     | 12.578 | –      | 8.296  | –     | 4.876  | 3.481 |

**Fig. S2.** SEM images and EDX data for [Cu(L)<sub>2</sub>Br]Br (a), [Cu(L)<sub>2</sub>Br]BF<sub>4</sub> (b), [Cu(L)<sub>2</sub>Br]ClO<sub>4</sub> (c), and [Cu(L)<sub>2</sub>Br]NO<sub>3</sub> (d).

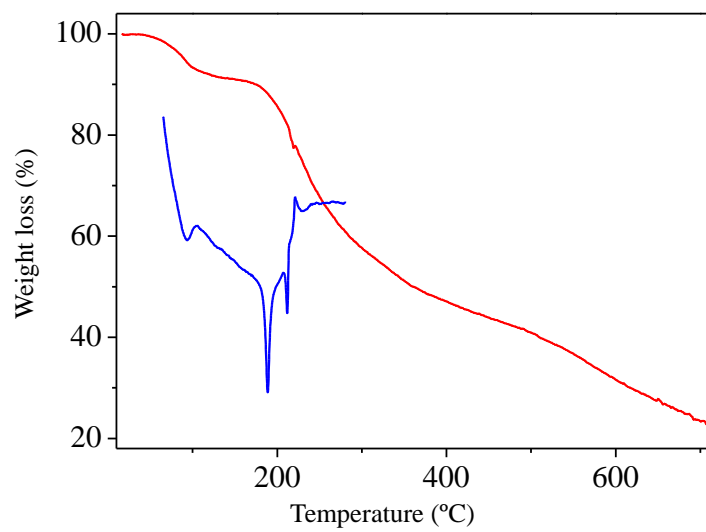

**Fig. S3.** TGA (red) and DSC (blue) curves of  $[\text{Cu}(\text{L})_2\text{Br}][\text{Br}\cdot 2\text{H}_2\text{O}]\cdot 4\text{CH}_3\text{OH}$ .
